# Supplementary material
Source: PubMed Central journal article supplement (PMC6310233)
Supplement: NIHMS1511700-supplement-1.pdf [file NIHMS1511700-supplement-1.pdf]

**Table S1. Avian influenza viruses (excluding H7N9) isolated during the surveillance between February 2017 and January 2018 (related to Table 1).**

| Time period             | Location | Total number of markets or farms investigated | Number of samples collected | Avian influenza virus                 |                                       |                                                 |                                                    |                                                  |      |                            |                            |       |
|-------------------------|----------|-----------------------------------------------|-----------------------------|---------------------------------------|---------------------------------------|-------------------------------------------------|----------------------------------------------------|--------------------------------------------------|------|----------------------------|----------------------------|-------|
|                         |          |                                               |                             | H1N1/N2/N3/N8                         | H3N1/N2/N8                            | H4N2/N6/N8                                      | H5N1/N2/N3/N6                                      | H6N1/N6/N2/N8                                    | H9N2 | H10N3/N8                   | H11N2/N3/N8/N9             | H12N5 |
| Feb. 2017–<br>May. 2017 | Market   | 379                                           | 12,504                      | 22<br>(H1N2=21,<br>H1N8=1)            | 61<br>(H3N1=2,<br>H3N2=58,<br>H3N8=1) | 11<br>(H4N2=4,<br>H4N6=1,<br>H4N8=6)            | 51<br>(H5N1=3,<br>H5N2=4,<br>H5N6=44)              | 89<br>(H6N2=13,<br>H6N6=74,<br>H6N8=2)           | 215  | 0                          | 2<br>(H11N8=1,<br>H11N9=1) | 1     |
|                         | Farm     | 665                                           | 17,697                      | 0                                     | 12<br>(H3N2=9,<br>H3N8=3)             | 1<br>(H4N6)                                     | 6<br>(H5N2=1,<br>H5N3=1,<br>H5N6=4)                | 36<br>(H6N1=2,<br>H6N2=4,<br>H6N6=25,<br>H6N8=5) | 28   | 1<br>(H10N8)               | 1<br>(H11N2)               | 0     |
| Oct. 2017–<br>Jan. 2018 | Market   | 204                                           | 12,967                      | 21<br>(H1N1=2,<br>H1N2=6,<br>H1N3=13) | 100<br>(H3N2=93,<br>H3N8=7)           | 16<br>(H4N2=5,<br>H4N3=1,<br>H4N6=5,<br>H4N8=5) | 222<br>(H5N1=5,<br>H5N2=1,<br>H5N3=2,<br>H5N6=214) | 105<br>(H6N2=9,<br>H6N6=94,<br>H6N8=2)           | 404  | 9<br>(H10N3=7,<br>H10N8=2) | 2 (H11N2=1,<br>H11N3=1)    | 0     |
|                         | Farm     | 374                                           | 10,716                      | 0                                     | 7<br>(H3N2)                           | 0                                               | 3<br>(H5N6=3)                                      | 6<br>(H6N2=3,<br>H6N6=3)                         | 20   | 1<br>(H10N8)               | 0                          | 0     |
| Total                   |          | 1,622                                         | 53,884                      | 43                                    | 180                                   | 28                                              | 282                                                | 236                                              | 667  | 11                         | 5                          | 1     |

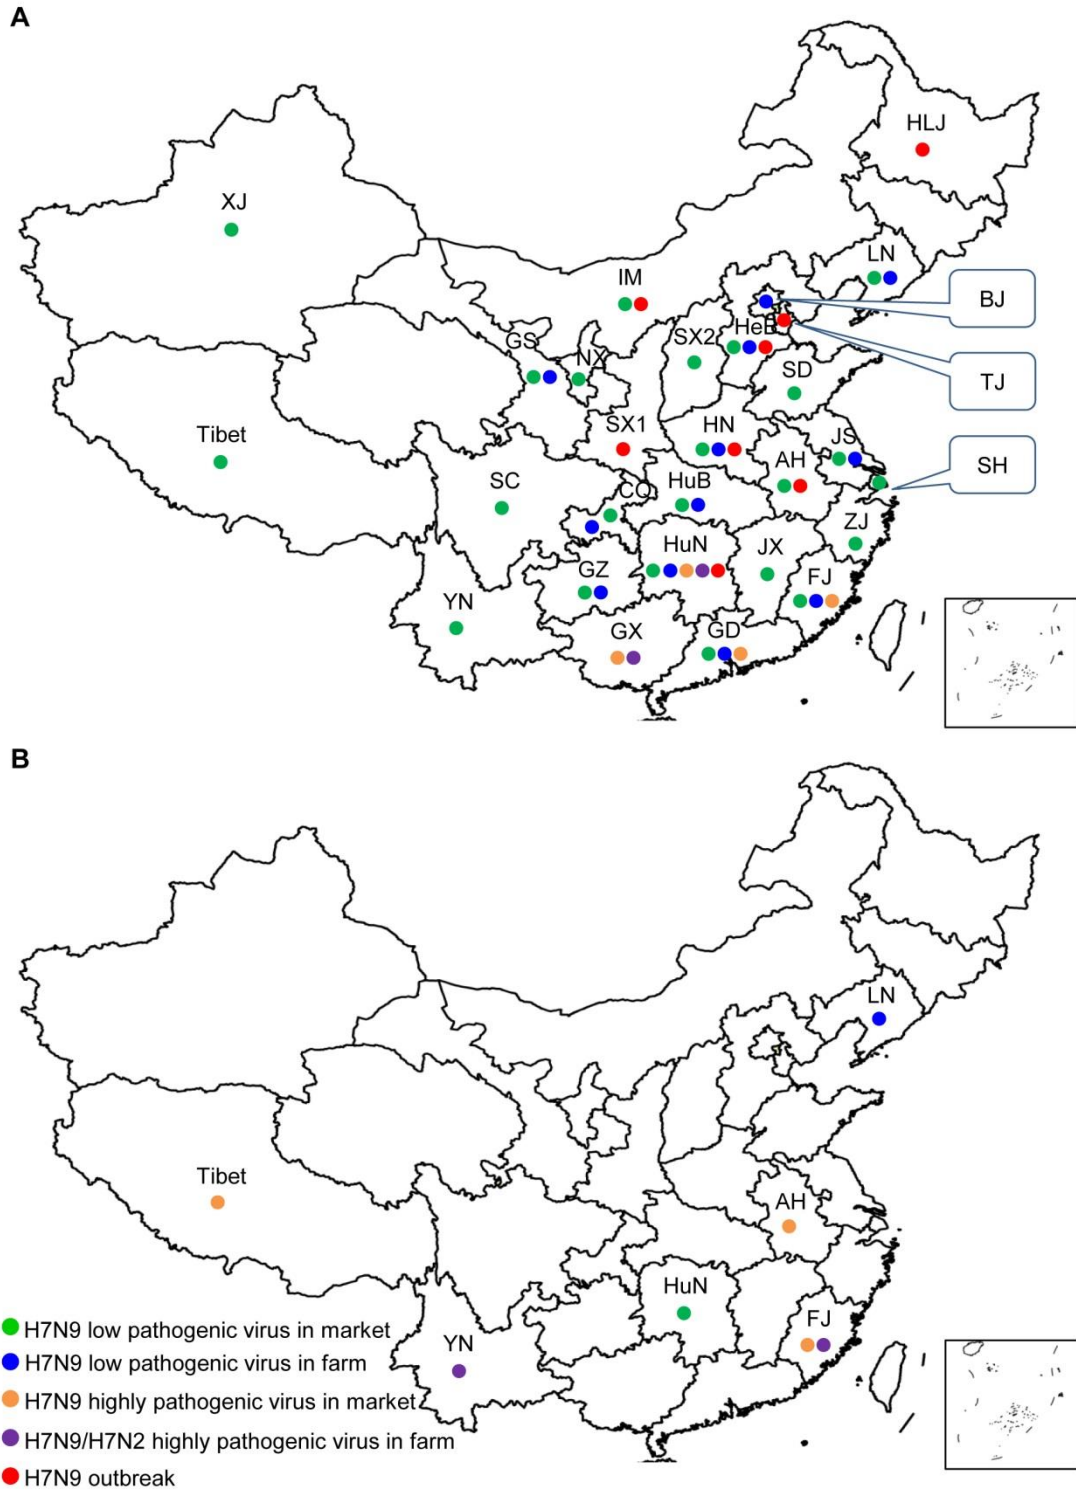

**Figure S1. Geographic distribution of the H7N9 viruses detected in this study (related to Table 1).** (A) Provinces where the H7N9 viruses were detected in the first round of surveillance and where disease outbreaks occurred. (B) Provinces where the H7N2 and H7N9 viruses were detected in the second surveillance.

**Table S2. HA gene of the H7N9 low pathogenic viruses isolated in 2017 and sequenced in this study (related to Figure 1A).**

| No. | Viruses                              | Accession number in GenBank |
|-----|--------------------------------------|-----------------------------|
| 1   | A/chicken/Anhui/S2351/2017(H7N9)     | MH209256                    |
| 2   | A/chicken/Beijing/SD147/2017(H7N9)   | MH209257                    |
| 3   | A/chicken/Chongqing/SD057/2017(H7N9) | MH209258                    |
| 4   | A/chicken/Guangdong/SD004/2017(H7N9) | MH209259                    |
| 5   | A/chicken/Gansu/SD162/2017(H7N9)     | MH209260                    |
| 6   | A/chicken/Guizhou/SD106/2017(H7N9)   | MH209261                    |
| 7   | A/chicken/Henan/SD181/2017(H7N9)     | MH209262                    |
| 8   | A/chicken/Hubei/SD095/2017(H7N9)     | MH209263                    |
| 9   | A/chicken/Jiangsu/S10428/2017(H7N9)  | MH209264                    |
| 10  | A/chicken/Ningxia/S1215/2017(H7N9)   | MH209265                    |
| 11  | A/chicken/Sichuan/S1267/2017(H7N9)   | MH209266                    |
| 12  | A/chicken/Shandong/S1174/2017(H7N9)  | MH209267                    |
| 13  | A/chicken/Shanxi/SD179/2017(H7N9)    | MH209268                    |
| 14  | A/chicken/Tibet/SD143/2017(H7N9)     | MH209269                    |
| 15  | A/chicken/Zhejiang/SD036/2017(H7N9)  | MH209270                    |
| 16  | A/chicken/Fujian/SD180/2017(H7N9)    | MH209271                    |
| 17  | A/chicken/Hebei/SD167/2017(H7N9)     | MH209272                    |
| 18  | A/duck/Fujian/S10998/2017(H7N9)      | MH209273                    |
| 19  | A/duck/Hunan/S2760/2017(H7N9)        | MH209274                    |
| 20  | A/duck/Jiangsu/S12863/2017(H7N9)     | MH209275                    |
| 21  | A/chicken/Hunan/S31330/2017(H7N9)    | MH209276                    |
| 22  | A/chicken/Liaoning/SD207/2017(H7N9)  | MH209277                    |
| 23  | A/chicken/Xinjiang/SD192/2017(H7N9)  | MH209278                    |
| 24  | A/chicken/Yunnan/SD193/2017(H7N9)    | MH209279                    |

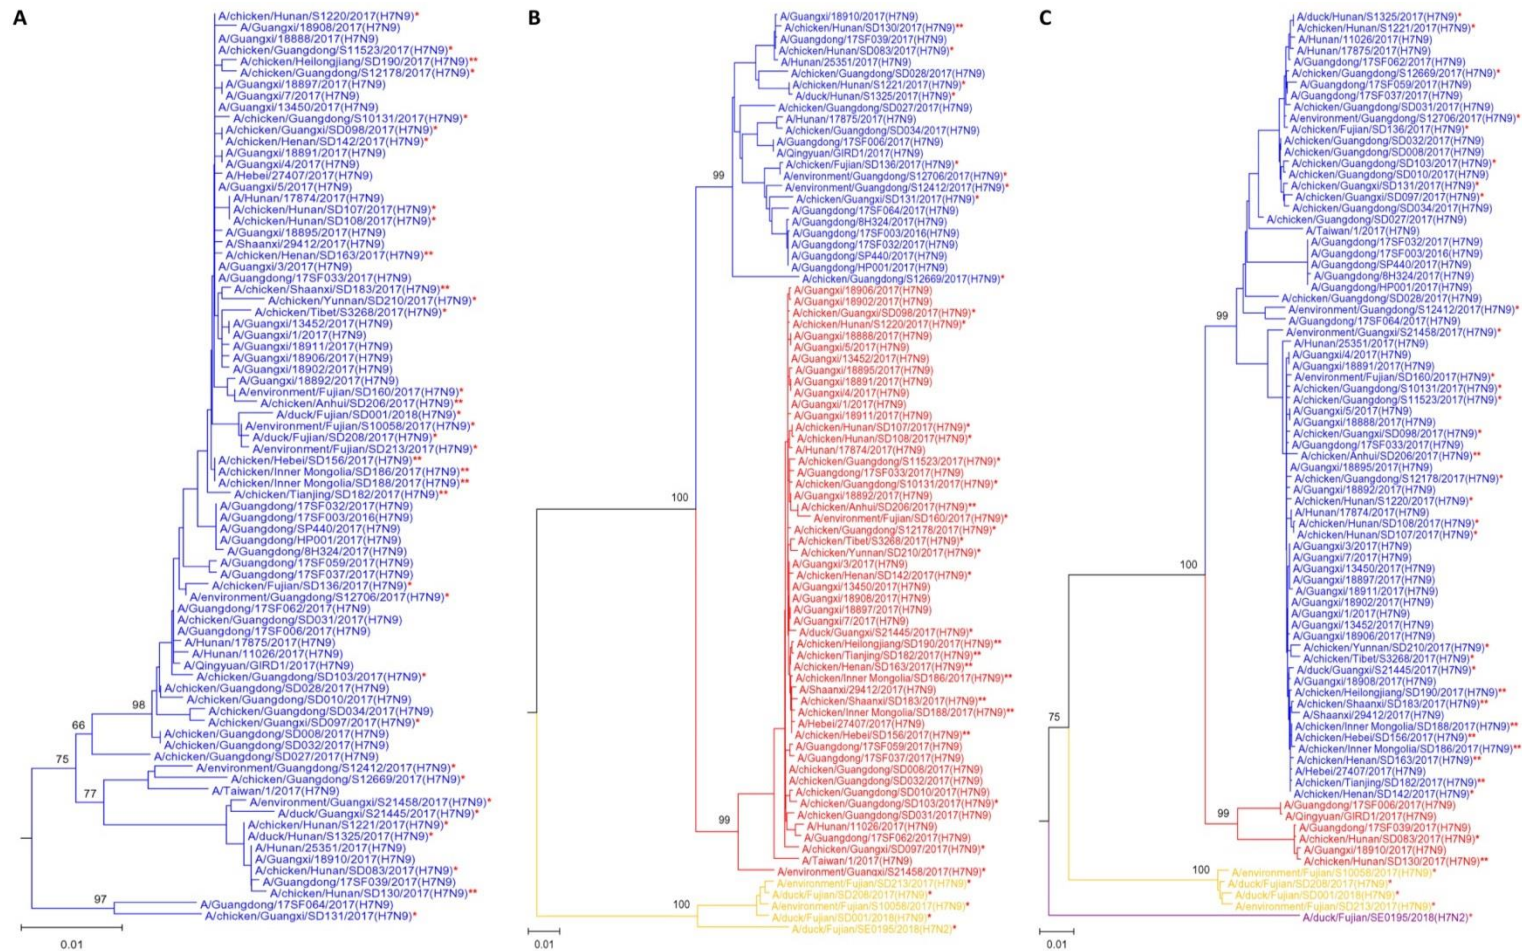

**Figure S2. The phylogenetic trees of the NA, PB2, and PB1 of H7N9 highly pathogenic viruses (related to Figure 1).** (A) NA, (B) PB2, and (C) PB1. H7N9 highly pathogenic viruses sequenced in this study are labeled with single asterisk or double asterisks; double asterisks denote the viruses that have caused disease outbreaks in poultry farms. The color coding is the same as Figure 1B.

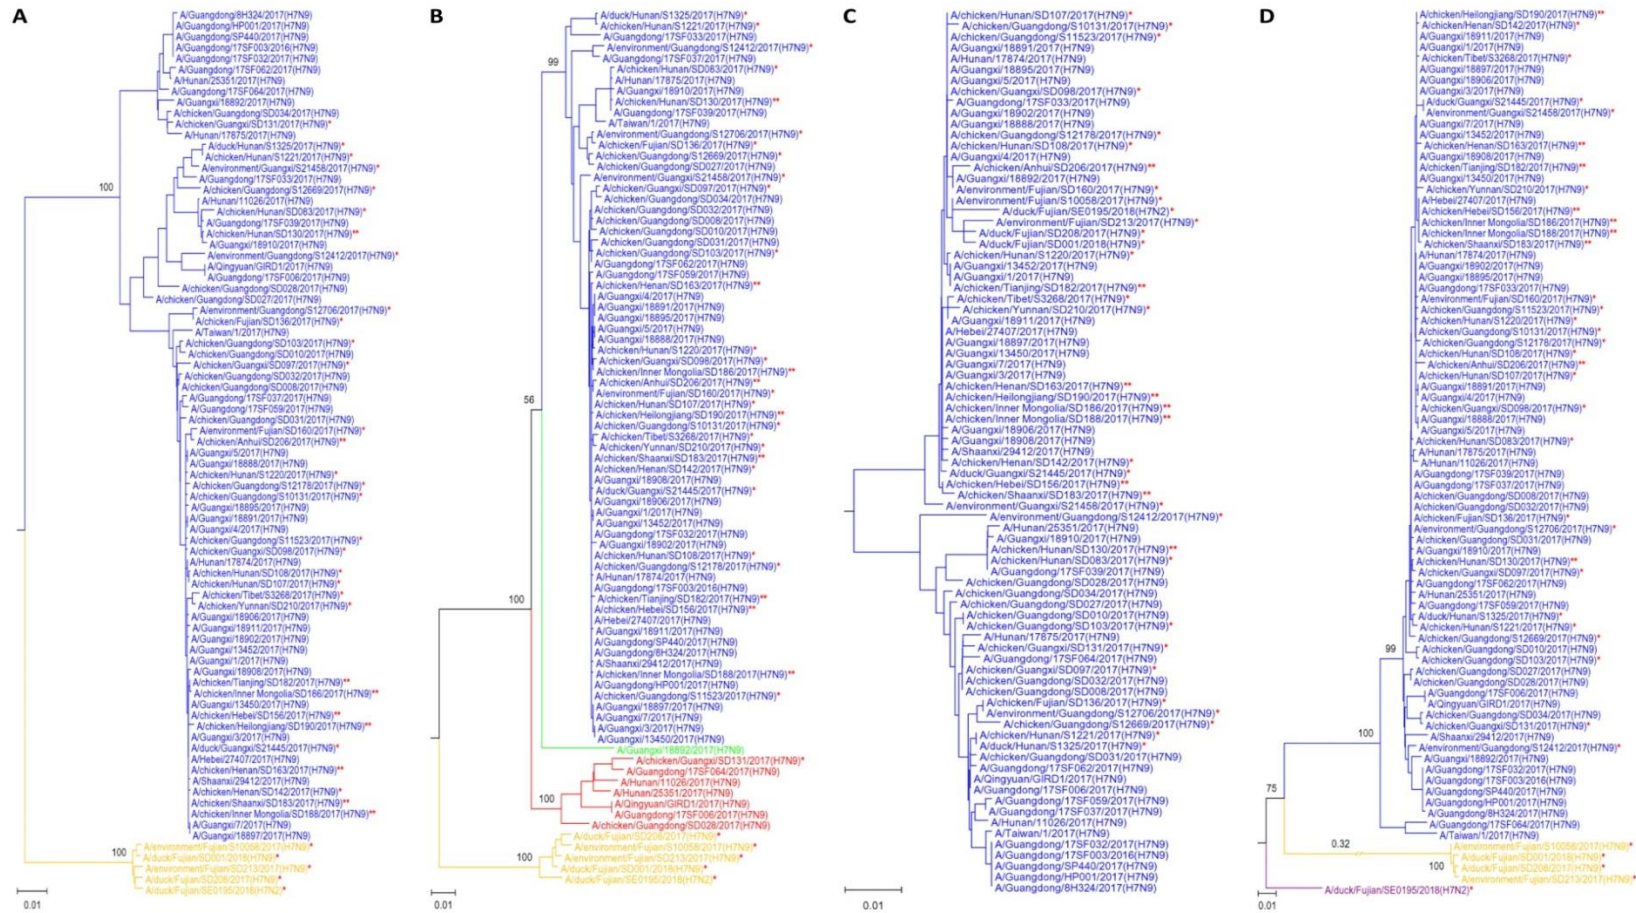

**Figure S3. The phylogenetic trees of the PA, NP, M, and NS genes of H7N9 highly pathogenic viruses (related to Figure 1).** (A) PA, (B) NP, (C) M, and (D) NS. H7N9 highly pathogenic viruses sequenced in this study are labeled with single asterisk or double asterisks; double asterisks denote the viruses that have caused disease outbreaks in poultry farms. The color coding is the same as Figure 1B.

**Table S3. Amplification primers (related to the STAR Methods).**

| REAGENT or RESOURCE                            | SOURCE     | IDENTIFIER |
|------------------------------------------------|------------|------------|
| <b>Oligonucleotides</b>                        |            |            |
| Amplification primers                          |            |            |
| H7N9-PB2-F: 5'-AGCRAAAGCAGGTCAAATATATTCAAT-3'  | This study | N/A        |
| H7N9-PB2-R: 5'-AGTAGAAACAAGGTCGTTTTAAACTATT-3' | This study | N/A        |
| H7N9-PB1-F: 5'-AGCAAAAGCAGGCAAACCATT-3'        | This study | N/A        |
| H7N9-PB1-R: 5'-AGTAGAAACAAGGCATTTTTTCATG-3'    | This study | N/A        |
| H7N9-PA-F: 5'-AGCAAAAGCAGGTACTGATCC-3'         | This study | N/A        |
| H7N9-PA-R: 5'-AGTAGAAAGAAGGTACCTTTTTGGA-3'     | This study | N/A        |
| H7N9-NP-F: 5'-GCAGGGTAGATAATCACTCAC-3'         | This study | N/A        |
| H7N9-NP-R: 5'-AGTAGAAACAAGGTATTTTTTC-3'        | This study | N/A        |
| H7N9-M-F: 5'-AGCAGGTAGATATTGAAAAATGA-3'        | This study | N/A        |
| H7N9-M-R: 5'-GTAGAAACAAGGTAGTTTTTTAC-3'        | This study | N/A        |
| H7N9-NS-F: 5'-AGCAAAAGCAGGGTGACAAA-3'          | This study | N/A        |
| H7N9-NS-R: 5'-AGAAACAAGGTGTTTTTA-3'            | This study | N/A        |

**Table S4. Sequencing primers (related to the STAR Methods).**

| REAGENT or RESOURCE                        | SOURCE               | IDENTIFIER |
|--------------------------------------------|----------------------|------------|
| <b>Oligonucleotides</b>                    |                      |            |
| Portion of the NA gene sequencing primers: |                      |            |
| M13-F: 5'-GTAAAACGACGGCCAGT-3'             | Alvarez et al., 2010 | N/A        |
| M13-R: 5'-CAGGAAACAGCTATGAC-3'             | Alvarez et al., 2010 | N/A        |
| H7N9 virus sequencing primers:             |                      |            |
| PB2-F279: 5'-TCTGGCTGTGACGTGGTG-3'         | This study           | N/A        |
| PB2-F652: 5'-CTACCAGTAGCTGGAGGGACA-3'      | This study           | N/A        |
| PB2-R526: 5'-TTCTGGCTCCAACCTCGT-3'         | This study           | N/A        |
| PB2-F1234: 5'-GTATTCTCACAAAGAGGATTGCATG-3' | This study           | N/A        |
| PB2-F1736: 5'-CCTTTCAATCCCTAGTGCC-3'       | This study           | N/A        |
| PB2-R1872: 5'-GGCTGCTGCAAATGGTAATAG-3'     | This study           | N/A        |
| PB1-F202: 5'-GAGACTGGAGCACCCCAACT-3'       | This study           | N/A        |
| PB1-F931: 5'-ACTGGAGACAATACCAAGCGGA-3'     | This study           | N/A        |
| PB1-R772: 5'-GCTCCTCGCTAATGCTTCTA-3'       | This study           | N/A        |
| PB1-R1243: 5'-TTGAACATACCCATCATCAT-3'      | This study           | N/A        |
| PB1-F1613: 5'-ATCTTGACCAGCGACAGC-3'        | This study           | N/A        |
| PB1-R1845: 5'-CAATTCCCATTCAAGCAG-3'        | This study           | N/A        |
| PA-F259: 5'-GCCTGGACAGTGGTGAATAG-3'        | This study           | N/A        |
| PA-F876: 5'-TGAGGACCCGAGCCACGA-3'          | This study           | N/A        |
| PA-R660: 5'-TTTGGTCGGCAAGCCTG-3'           | This study           | N/A        |
| PA-F1400: 5'-AATGAAGGGAGTGACATAA-3'        | This study           | N/A        |
| PA-F1794: 5'-ACAGATTGAAAGCATGATTG-3'       | This study           | N/A        |
| PA-R2020: 5'-GTTCCAGGTTCCAGGTT-3'          | This study           | N/A        |
| HA-R697: 5'-TAACTTGTGGTCTCGCTCC-3'         | This study           | N/A        |
| HA-F507: 5'-GTTCCCGCAGATGACTA-3'           | This study           | N/A        |
| HA-R1566: 5'-AACCAAAGTATCACATCT-3'         | This study           | N/A        |
| HA-F1222: 5'-GAATTCAATGAGGTAGAG-3'         | This study           | N/A        |
| NP-F247: 5'-CTCTCTGCATTTGATGAAAAG-3'       | This study           | N/A        |
| NP-R500: 5'-GGAGAGTTGATCCTTGCAT-3'         | This study           | N/A        |
| NP-R1370: 5'-AAGACTCCCGCCCTGGAA-3'         | This study           | N/A        |
| NP-F953: 5'-CAAATGAGAACCCAGCACA-3'         | This study           | N/A        |
| N9-F299: 5'-ATGCAGTAAGAATTGGAGA-3'         | This study           | N/A        |
| N9-R515: 5'-TACTTGACCACCCAATGC-3'          | This study           | N/A        |
| N9-F650: 5'-RAAACATACTAAGAACACA-3'         | This study           | N/A        |
| N9-F1070: 5'-GGCTAGGGAGGACAATAAG-3'        | This study           | N/A        |
| N2-F332: 5'-TCTGGGTRACAAGAGAAC-3'          | This study           | N/A        |
| N2-F543: 5'-TGATGGRAAAGCATGGTT-3'          | This study           | N/A        |
| N2-R730: 5'-ACAAGTYCCATTGATGCA-3'          | This study           | N/A        |
| N2-F1060: 5'-GGGAATGATGTTTGGATG-3'         | This study           | N/A        |
| M-F239: 5'-CGAGGACTGCAGCGTAGACG-3'         | This study           | N/A        |
| M-R462: 5'-ATCTGCTCACAAAGTGGCACA-3'        | This study           | N/A        |
| NS-R595: 5'-TTCTCCAAGCGAATCTC-3'           | This study           | N/A        |
| NS-F129: 5'-CGGCTTCGCCGAGATCAGAA-3'        | This study           | N/A        |
| HA Cleavage site sequencing primer:        |                      |            |
| HA-F869: 5'-GCTATCATAGTGGAGGGAC-3'         | This study           | N/A        |
